# Supplementary material for: Feasibility of extracting data from electronic medical records for research: an international comparative study
Source: PubMed Central journal article supplement (PMC4944506; doi:10.1186/s12911-016-0332-1), 2016-07-13
Supplement: 12911_2016_332_MOESM4_ESM.pdf [file 12911_2016_332_MOESM4_ESM.pdf]

#### Additional File 4: Number of interviewees; table; PDF

| Country         | Total number of interviewees | Physician | Academic | Information commissioner | EMR provider |
|-----------------|------------------------------|-----------|----------|--------------------------|--------------|
| Australia       | 3                            | 1         | 1        | 1                        | -            |
| Austria         | 5                            | 1         | 1        | 1                        | 2            |
| Brazil*         | 3                            | 1         | 1        | -                        | 1            |
| China           | 6                            | 3         | 2        | 1                        | -            |
| Czech Republic  | 1                            | -         | 1        | -                        | -            |
| India           | 5                            | 3         | 2        | -                        | -            |
| Indonesia       | 2                            | -         | 1        | 1                        | -            |
| Italy*          | 6                            | 3         | 2        | -                        | 1            |
| Mexico          | 1                            | -         | 1        | -                        | -            |
| The Netherlands | 2                            | -         | 2        | -                        | -            |
| Poland          | 3                            | -         | 2        | -                        | 1            |
| South Africa*   | 3                            | 1         | 1        | -                        | 1            |
| Saudi Arabia*   | 4                            | 3         | 1        | -                        | -            |
| Korea, Rep.*    | 2                            | -         | 2        | -                        | -            |
| Taiwan*         | 6                            | 3         | 2        | -                        | 1            |
| UAE*            | 7                            | 6         | 1        | -                        | -            |
| All countries   | 59                           | 25        | 23       | 4                        | 7            |

\*Seven countries for which the extent of EMR adoption and the quality and consistency of EMR data was assessed
